# Supplementary material for: A Diet Pattern with More Dairy and Nuts, but Less Meat Is Related to Lower Risk of Developing Hypertension in Middle-Aged Adults: The Atherosclerosis Risk in Communities (ARIC) Study
Source: Nutrients. 2013 May 21;5(5):1719–33. doi: 10.3390/nu5051719 (PMC3708346; doi:10.3390/nu5051719)
Supplement: Supplementary File 1 — Supplementary Information (PDF, 43 KB) [file nutrients-05-01719-s001.pdf]

## Supplementary Information

**Table S1.** Hazard ratios (95% confidence interval) of the relation between food group intake and risk of developing hypertension, ARIC,  $n = 9913$ .

|                                        | Quintiles of food group intake (servings/day) |                  |                  |                  |                  | $p_{\text{for trend}}$ |
|----------------------------------------|-----------------------------------------------|------------------|------------------|------------------|------------------|------------------------|
|                                        | Q1 (low)                                      | Q2               | Q3               | Q4               | Q5 (high)        |                        |
| HFScore                                | 1                                             | 0.96 (0.86–1.08) | 0.89 (0.79–1.02) | 0.92 (0.82–1.03) | 0.84 (0.73–0.96) | 0.01                   |
| <i>Food group</i>                      |                                               |                  |                  |                  |                  |                        |
| Vegetables                             | 1                                             | 0.97 (0.86–1.09) | 0.94 (0.83–1.06) | 0.97 (0.85–1.09) | 0.96 (0.84–1.09) | 0.59                   |
| Fruit                                  | 1                                             | 1.06 (0.94–1.19) | 0.98 (0.87–1.10) | 1.08 (0.96–1.22) | 1.06 (0.93–1.20) | 0.37                   |
| Legumes <sup>1</sup>                   | 1                                             | 1.01 (0.85–1.21) | 1.00 (0.73–1.35) |                  |                  | 0.94                   |
| Whole grain                            | 1                                             | 1.04 (0.93–1.17) | 1.03 (0.91–1.16) | 1.00 (0.89–1.13) | 0.99 (0.87–1.12) | 0.61                   |
| Refined grain                          | 1                                             | 1.04 (0.92–1.16) | 0.99 (0.88–1.12) | 1.03 (0.91–1.17) | 1.00 (0.87–1.15) | 0.92                   |
| Nuts                                   | 1                                             | 1.11 (0.98–1.26) | 0.96 (0.87–1.07) | 0.91 (0.81–1.03) | 0.86 (0.77–0.97) | 0.001                  |
| Dairy                                  | 1                                             | 0.95 (0.85–1.07) | 0.94 (0.84–1.06) | 0.91 (0.81–1.03) | 0.85 (0.74–0.96) | 0.009                  |
| Fish                                   | 1                                             | 1.01 (0.90–1.14) | 1.04 (0.92–1.18) | 1.06 (0.94–1.19) | 1.09 (0.97–1.23) | 0.11                   |
| Meat <sup>2</sup>                      | 1                                             | 1.01 (0.90–1.13) | 0.90 (0.79–1.02) | 0.87 (0.76–1.00) | 0.82 (0.71–0.94) | 0.002                  |
| Coffee, tea <sup>3</sup>               | 1                                             | 1.02 (0.88–1.17) | 1.01 (0.87–1.17) | 0.91 (0.77–1.08) | 0.83 (0.68–1.02) | 0.01                   |
| Alcohol <sup>4</sup>                   | 1                                             | 1.07 (0.98–1.18) |                  |                  |                  | 0.72                   |
| Sugar sweetened beverages <sup>5</sup> | 1                                             | 0.90 (0.81–0.99) | 0.98 (0.86–1.11) |                  |                  | 0.17                   |
| Diet beverages <sup>5</sup>            | 1                                             | 0.89 (0.80–0.98) | 0.83 (0.75–0.92) |                  |                  | <0.001                 |

<sup>1</sup> Legumes are categorized as Q1 = 0,  $0 \leq Q2 < 1$ ,  $Q3 \geq 1$  servings/day; <sup>2</sup> Meat intake is reverse scoring: Q1 = high and Q5 = low intake; <sup>3</sup> Coffee, tea categories: Q1 = 0;  $0 \leq Q2 < 2$ ;  $2 \leq Q3 < 4$ ;  $4 \leq Q4 < 6$ ;  $Q5 \geq 6$  cups per day; <sup>4</sup> Alcohol categories defined by gender: Q2—for male: 10–50 g; for female: 5–30 g; Q1—other; <sup>5</sup> Sugar sweetened beverages and diet beverage categories defined as  $Q1 \geq 1$ ,  $Q2 < 1$ ,  $Q3 = 0$ .
